# Supplementary material
Source: PubMed Central journal article supplement (PMC3737455)
Supplement: NIHMS420118-supplement-Supporting_Information.pdf [file NIHMS420118-supplement-Supporting_Information.pdf]

## Electronic Supplementary Information

### **Zwitterionic dithiocarboxylates derived from N-heterocyclic carbenes: coordination to gold surfaces**

Ulrich Siemeling,<sup>\*a,c</sup>  
Henry Memczak,<sup>a,c</sup> Clemens Bruhn,<sup>a</sup> Florian Vogel,<sup>b,c</sup> Frank  
Träger,<sup>b,c</sup> Joe E. Baio<sup>d</sup> and Tobias Weidner<sup>d</sup>

<sup>a</sup>*Institute of Chemistry, University of Kassel, Heinrich-Plett-Str. 40, 34132 Kassel, Germany. E-mail: siemeling@uni-kassel.de*

<sup>b</sup>*Institute of Physics, University of Kassel, Heinrich-Plett-Str. 40, 34132 Kassel, Germany*

<sup>c</sup>*Center for Interdisciplinary Nanostructure Science and Technology, University of Kassel, Heinrich-Plett-Str. 40, 34132 Kassel, Germany*

<sup>d</sup>*National ESCA and Surface Analysis Center for Biomedical Problems (NESAC/BIO), Departments of Bioengineering and Chemical Engineering, University of Washington, Seattle, Washington 98195, USA*

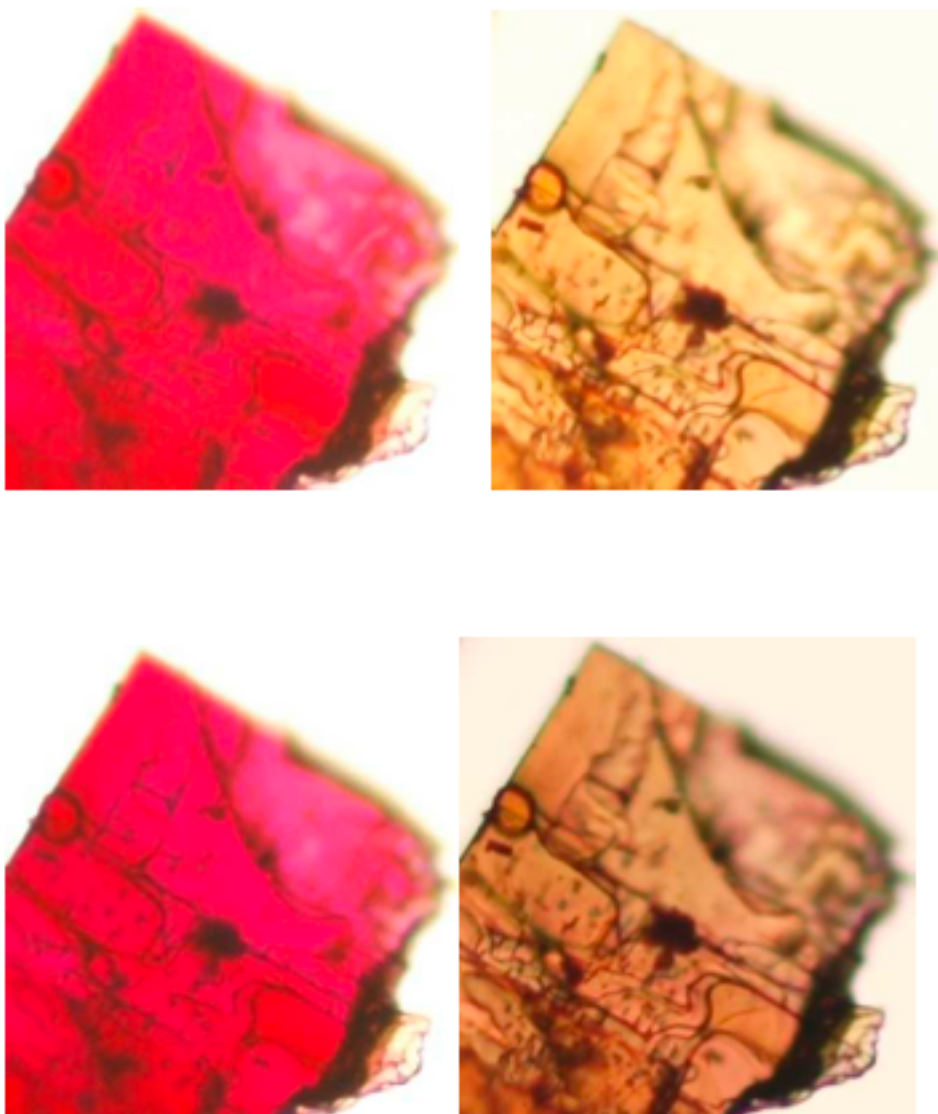

**Fig. S1** Pleochroitic behaviour of a single-crystal of **3+-CS2-** in linearly polarised light. The crystal is turned by  $0^\circ$  (top left),  $90^\circ$  (top right),  $180^\circ$  (bottom left) and  $270^\circ$  (bottom right).
